# Supplementary material for: Using PEGylated magnetic nanoparticles to describe the EPR effect in tumor for predicting therapeutic efficacy of micelle drugs
Source: Royal Society of Chemistry journal article supplement (doi:10.1039/c7nr08319j), 2017-12-21
Supplement: c7nr08319j1.pdf [file c7nr08319j1.pdf]

## Supporting information

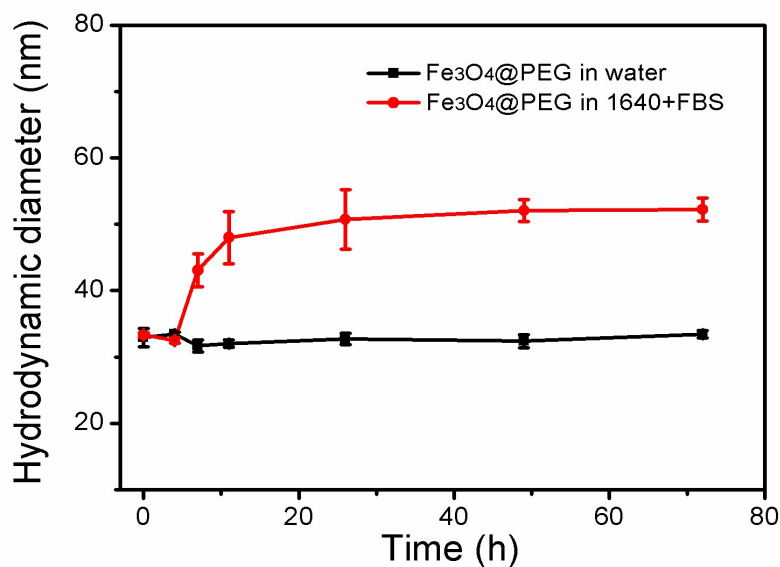

**Figure S1.** Average hydrodynamic diameters of Fe<sub>3</sub>O<sub>4</sub>@PEG in deionized water and RPMI 1640 with 10% FBS for 72 h, respectively. The data is shown as mean  $\pm$  SE (n = 3).

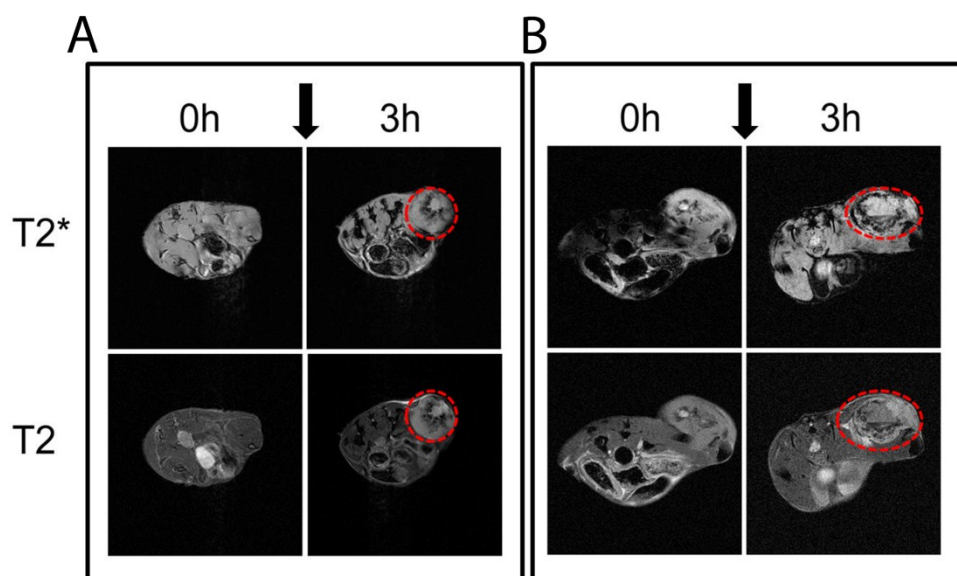

**Figure S2.** T<sub>2</sub> and T<sub>2</sub>\*-weighted MR images of two mice tumors acquired before and 3h after single tail vein injection of Fe<sub>3</sub>O<sub>4</sub>@PEG (30 mg Fe/kg body weight) using a 7 T MR scanner. The red dotted line displayed the tumor site.

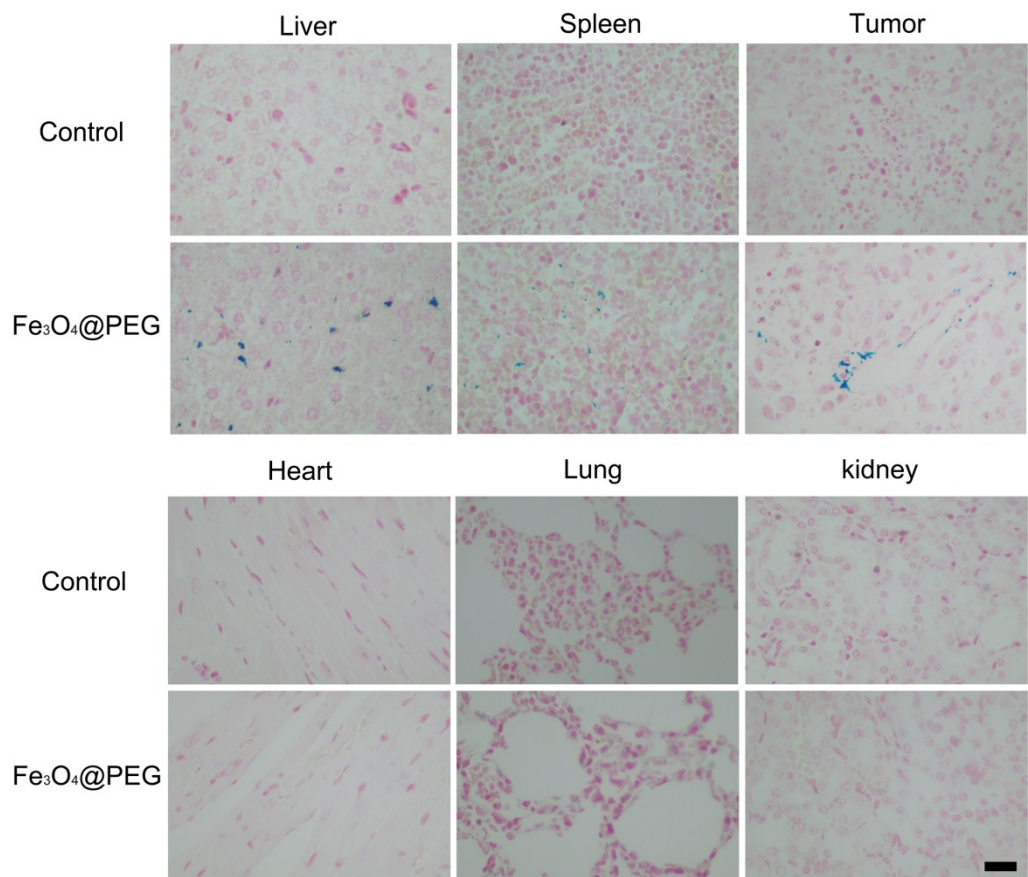

**Figure S3.** Nuclear fast red and Prussian blue double staining images (400 ×) of mice organs and tumors 24 h post-injection of normal saline and Fe<sub>3</sub>O<sub>4</sub>@PEG. The black bar represented 20 μm.

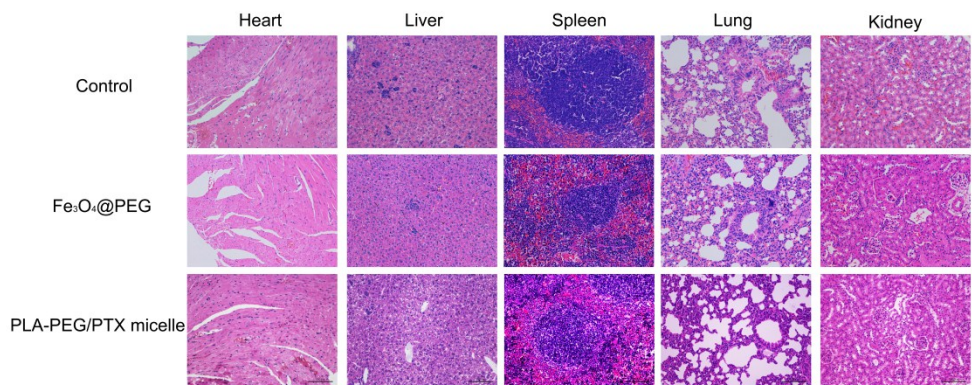

**Figure S4.** HE staining images (200 ×) of mice organs after intravenous administration of Fe<sub>3</sub>O<sub>4</sub>@PEG and PLA-PEG/PTX micelle, respectively. The black Bar represented 100 μm.

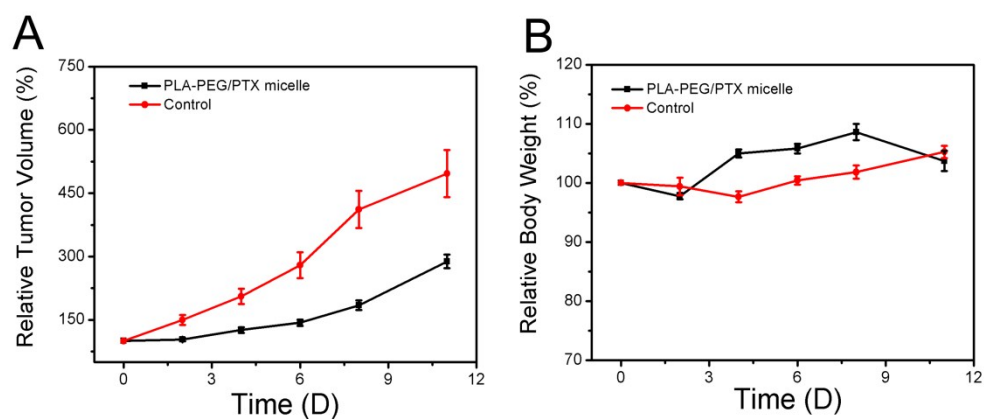

**Figure S5.** (A) Tumor growth behavior of mice and (B) mice body weight with and without treatment by repeated intravenous injection of PLA-PEG/PTX micelle in 11 days (n = 12). The data is shown as mean  $\pm$  SE.

**Table S1**

The initial tumor volume of three groups in in vivo antitumor assay on day 0.

|   | A (mm <sup>3</sup> )                                    | B (mm <sup>3</sup> ) | C (mm <sup>3</sup> ) |
|---|---------------------------------------------------------|----------------------|----------------------|
|   | 95                                                      | 96                   | 140                  |
|   | 138                                                     | 144                  | 94                   |
|   | 125                                                     | 183                  | 155                  |
|   | 135                                                     |                      |                      |
|   | 122                                                     |                      |                      |
|   | 118                                                     |                      |                      |
| P | A vs. B, P > 0.05; A vs. C, P > 0.05; B vs. C, P > 0.05 |                      |                      |
